# Supplementary material
Source: HighWire-hosted journal article supplement (https://bmjopen.bmj.com/content/11/2/e046376)
Supplement: inline-supplementary-material-1 [file inline-supplementary-material-1.pdf]

**SUPPLEMENTARY TABLE 1 OVERVIEW OF ISELF-HELP MODULES AND SUPPORTING RESOURCES**

| Module                           | Overview                                                                                                                                                                                                                                                                                                                                                                                                                                              | PAR Content                                                                                                                                         | Type of Resource              |
|----------------------------------|-------------------------------------------------------------------------------------------------------------------------------------------------------------------------------------------------------------------------------------------------------------------------------------------------------------------------------------------------------------------------------------------------------------------------------------------------------|-----------------------------------------------------------------------------------------------------------------------------------------------------|-------------------------------|
| <b>0) Welcome</b>                | Led by pain team: 2 physios, 2 psychologist, 1 occupational therapist<br>Say hi and introduce yourself to your group on the community page<br>Check out and agree to the group guidelines<br>Read what the programme aims to offer you<br>Start thinking about what pain management would look like for you, what would you like to change? Do more of? Do less of?<br>Patients and Maori community members sharing their pain management experiences | Rules and expectations                                                                                                                              | Text                          |
|                                  |                                                                                                                                                                                                                                                                                                                                                                                                                                                       | Introductory video                                                                                                                                  | Video                         |
|                                  |                                                                                                                                                                                                                                                                                                                                                                                                                                                       | Pain Ngata                                                                                                                                          | Illustration                  |
|                                  |                                                                                                                                                                                                                                                                                                                                                                                                                                                       | Pain as baggage                                                                                                                                     | Illustration                  |
|                                  |                                                                                                                                                                                                                                                                                                                                                                                                                                                       | Tame the beast                                                                                                                                      | <a href="#">YouTube video</a> |
|                                  |                                                                                                                                                                                                                                                                                                                                                                                                                                                       | Patient stories                                                                                                                                     | Video                         |
| <b>1) Exercise</b>               | Led by: Two physiotherapists<br>Explore why exercising is worth the challenges<br>Begin a gentle shared exercise programme we can work through together over the next twelve weeks                                                                                                                                                                                                                                                                    | Introductory video                                                                                                                                  | Video                         |
|                                  |                                                                                                                                                                                                                                                                                                                                                                                                                                                       | Education video                                                                                                                                     | Video                         |
|                                  |                                                                                                                                                                                                                                                                                                                                                                                                                                                       | Components of exercise                                                                                                                              | Text                          |
|                                  |                                                                                                                                                                                                                                                                                                                                                                                                                                                       | Patient stories                                                                                                                                     | Video                         |
|                                  |                                                                                                                                                                                                                                                                                                                                                                                                                                                       | Exercise videos<br>- Bend and stretch<br>- Stairs<br>- Sit to stand<br>- Modified star jump<br>- Walk on spot<br>- Combined strengthening exercises | Video                         |
| <b>2) Sensory nervous system</b> | Led by: Two physiotherapist<br>Meet the sensory nervous system - what is its job and how does it work?<br>Explore what pain has to do with the sensory nervous system<br>Learn about the differences between acute and chronic pain                                                                                                                                                                                                                   | Introductory video                                                                                                                                  | Video                         |
|                                  |                                                                                                                                                                                                                                                                                                                                                                                                                                                       | Education video                                                                                                                                     | Video                         |
|                                  |                                                                                                                                                                                                                                                                                                                                                                                                                                                       | A normal example of SNS                                                                                                                             | Animation                     |
|                                  |                                                                                                                                                                                                                                                                                                                                                                                                                                                       | Visual illusions                                                                                                                                    | Text                          |
|                                  |                                                                                                                                                                                                                                                                                                                                                                                                                                                       | Gorilla story                                                                                                                                       | <a href="#">YouTube video</a> |
|                                  |                                                                                                                                                                                                                                                                                                                                                                                                                                                       | SNS in context of pain                                                                                                                              | Animation                     |
|                                  |                                                                                                                                                                                                                                                                                                                                                                                                                                                       | Snake story                                                                                                                                         | <a href="#">YouTube video</a> |
|                                  |                                                                                                                                                                                                                                                                                                                                                                                                                                                       | Purpose of pain                                                                                                                                     | Text                          |
|                                  |                                                                                                                                                                                                                                                                                                                                                                                                                                                       | Soldier in the battlefield                                                                                                                          | Text                          |
|                                  |                                                                                                                                                                                                                                                                                                                                                                                                                                                       | Acute vs. chronic pain                                                                                                                              | Text                          |

| Module             | Overview                                                                                                                                                                                                                                                                               | PAR Content                    | Type of Resource              |
|--------------------|----------------------------------------------------------------------------------------------------------------------------------------------------------------------------------------------------------------------------------------------------------------------------------------|--------------------------------|-------------------------------|
| 3) Stress response | Led by: Physiotherapist and Occupational therapist<br>The top priority for everyone's brain is to keep us alive and keep us safe<br>Our brains and bodies are hardwired with automatic protective responses<br>What is the relationship between these things and chronic pain?         | Visualisation of the staircase | Audio                         |
|                    |                                                                                                                                                                                                                                                                                        | Patient stories                | Video                         |
|                    |                                                                                                                                                                                                                                                                                        | Introductory video             | Video                         |
|                    |                                                                                                                                                                                                                                                                                        | Education video                | Video                         |
|                    |                                                                                                                                                                                                                                                                                        | Fear avoidance model           | Illustration                  |
|                    |                                                                                                                                                                                                                                                                                        | Breathing for pain             | Video                         |
|                    |                                                                                                                                                                                                                                                                                        |                                | Text                          |
|                    |                                                                                                                                                                                                                                                                                        |                                | Text                          |
|                    |                                                                                                                                                                                                                                                                                        | Tornado                        | Illustration                  |
|                    |                                                                                                                                                                                                                                                                                        | Breathwork video               | Video                         |
|                    |                                                                                                                                                                                                                                                                                        | Tiger in the room              | Illustration                  |
|                    |                                                                                                                                                                                                                                                                                        | Counting breathing             | Audio                         |
|                    |                                                                                                                                                                                                                                                                                        | Patient stories                | Video                         |
|                    |                                                                                                                                                                                                                                                                                        |                                |                               |
| 4) Think, feel, do | Led by: Psychologist and Occupational therapist<br>Discovering the links between what we think, how we feel and what we do<br>Developing an understanding of how thoughts, feelings and responses relate to pain experiences                                                           | Introductory video             | Video                         |
|                    |                                                                                                                                                                                                                                                                                        | Education video                | Video                         |
|                    |                                                                                                                                                                                                                                                                                        | Sushi train metaphor           | <a href="#">YouTube video</a> |
|                    |                                                                                                                                                                                                                                                                                        | The 3 main parts of your brain | <a href="#">YouTube video</a> |
|                    |                                                                                                                                                                                                                                                                                        | Triune brain                   | Illustration                  |
|                    |                                                                                                                                                                                                                                                                                        | Strategies to analyse thoughts | Text                          |
|                    |                                                                                                                                                                                                                                                                                        | Safe place                     | Audio                         |
|                    |                                                                                                                                                                                                                                                                                        | Body scan                      | Audio                         |
|                    |                                                                                                                                                                                                                                                                                        | Patient stories                | Video                         |
|                    |                                                                                                                                                                                                                                                                                        |                                |                               |
| 5) Memory of pain  | Led by: Physiotherapist and Occupational therapist<br>The focus is on the brain and its capacity to remember and learn<br>The memory of past experiences influences our experiences today<br>Noticing and recognising those patterns is the first step to influencing or changing them | Introductory video             | Video                         |
|                    |                                                                                                                                                                                                                                                                                        | Education video                | Video                         |
|                    |                                                                                                                                                                                                                                                                                        | Concept of neurotags           | Animation                     |
|                    |                                                                                                                                                                                                                                                                                        | Baker                          | <a href="#">YouTube video</a> |
|                    |                                                                                                                                                                                                                                                                                        | Implicit memory and pain       | Text                          |
|                    |                                                                                                                                                                                                                                                                                        | Deep breathing for pain        | Audio                         |
|                    |                                                                                                                                                                                                                                                                                        | Changing colour technique      | Audio                         |
|                    |                                                                                                                                                                                                                                                                                        | Change pain techniques         | Text                          |
|                    |                                                                                                                                                                                                                                                                                        | Patient stories                | Video                         |
|                    |                                                                                                                                                                                                                                                                                        |                                |                               |

| Module                              | Overview                                                                                                                                                                                                                               | PAR Content                              | Type of Resource |
|-------------------------------------|----------------------------------------------------------------------------------------------------------------------------------------------------------------------------------------------------------------------------------------|------------------------------------------|------------------|
| <b>6) Taking charge</b>             | Led by: Two physiotherapists                                                                                                                                                                                                           | Introductory video                       | Video            |
|                                     | Pain can dominate your decisions and choices                                                                                                                                                                                           | Education video                          | Video            |
|                                     | Take charge of your day to day life and activities despite living with pain<br>Organise yourself so you can do more                                                                                                                    | Purposeful activity and boom bust cycle  | Video            |
|                                     |                                                                                                                                                                                                                                        | Graded exposure                          | Video            |
|                                     |                                                                                                                                                                                                                                        | Interval training with Will              | Video            |
|                                     |                                                                                                                                                                                                                                        | Chair yoga flow                          | Video            |
|                                     |                                                                                                                                                                                                                                        | The sofa workout                         | Video            |
|                                     |                                                                                                                                                                                                                                        | STAR                                     | Audio            |
|                                     |                                                                                                                                                                                                                                        | Patient stories                          | Video            |
| <b>7) Thinking and doing skills</b> | Led by: Two Psychologists<br>Cope with pain using thinking and doing skills<br>Be Mindful                                                                                                                                              | Introductory video                       | Video            |
|                                     |                                                                                                                                                                                                                                        | Education video                          | Video            |
|                                     |                                                                                                                                                                                                                                        | Abdominal breathing                      | Text             |
|                                     |                                                                                                                                                                                                                                        | What is mindfulness                      | Text             |
|                                     |                                                                                                                                                                                                                                        | Brownpaper bag parcel                    | Audio            |
|                                     |                                                                                                                                                                                                                                        | The whiteboard                           | Audio            |
|                                     |                                                                                                                                                                                                                                        | Patient stories                          | Video            |
| <b>8) Medication</b>                | Led by: Pain medicine specialist and Psychologist<br>Learn about different types of pain medication<br>The chemicals in medicine link with different parts and actions of the brain<br>Open the natural drug cabinet inside your brain | Introductory video                       | Video            |
|                                     |                                                                                                                                                                                                                                        | Education video                          | Video            |
|                                     |                                                                                                                                                                                                                                        | Listed groups of medications             | Text             |
|                                     |                                                                                                                                                                                                                                        | Lock and key scenario                    | Illustration     |
|                                     |                                                                                                                                                                                                                                        | Medsafe website                          | Text             |
|                                     |                                                                                                                                                                                                                                        | Link to medication statements            | Text             |
|                                     |                                                                                                                                                                                                                                        | Patient stories                          | Video            |
| <b>9) Sleep</b>                     | Led by: Two physiotherapists<br>Why do our brains and bodies need sleep?<br>What do normal sleep patterns look like?<br><br>The relationship between pain and poor sleep                                                               | Introductory video                       | Video            |
|                                     |                                                                                                                                                                                                                                        | Education video                          | Video            |
|                                     |                                                                                                                                                                                                                                        | Similarities between fatigue and pain    | Text             |
|                                     |                                                                                                                                                                                                                                        | Sleep and pain                           | Text             |
|                                     |                                                                                                                                                                                                                                        | Facts about sleep                        | Text             |
|                                     |                                                                                                                                                                                                                                        | Fall asleep quickly                      | Text             |
|                                     |                                                                                                                                                                                                                                        | Six steps for better sleep               | Text             |
|                                     |                                                                                                                                                                                                                                        | Gentle yoga to help you sleep            | Text             |
|                                     |                                                                                                                                                                                                                                        | Combat sleep deprivation                 | Text             |
|                                     |                                                                                                                                                                                                                                        | Relaxation - blanket                     | Audio            |
|                                     |                                                                                                                                                                                                                                        | Relaxation - visualisation, the corridor | Audio            |

| Module                             | Overview                                                                                                                                                                                                                                                        | PAR Content             | Type of Resource              |
|------------------------------------|-----------------------------------------------------------------------------------------------------------------------------------------------------------------------------------------------------------------------------------------------------------------|-------------------------|-------------------------------|
| <b>10) Making plans with pain</b>  | Led by: Physio and Occupational therapist<br>Look forward to your future despite living with pain<br>Let who you are, what you value and what is important to you direct what you do, not the pain<br>Find a way to set goals and make plans that works for you | Patient stories         | Video                         |
|                                    |                                                                                                                                                                                                                                                                 | Introductory video      | Video                         |
|                                    |                                                                                                                                                                                                                                                                 | Education video         | Video                         |
|                                    |                                                                                                                                                                                                                                                                 | Tiny habits             | Text                          |
|                                    |                                                                                                                                                                                                                                                                 | Setting goals           | Text                          |
|                                    |                                                                                                                                                                                                                                                                 | Bull's eye              | Text                          |
|                                    |                                                                                                                                                                                                                                                                 | Goal setting form       | Text                          |
|                                    |                                                                                                                                                                                                                                                                 | Patient stories         | Video                         |
| <b>11) Sharing the journey</b>     | Led by: Physio and Psychologist<br>Your pain has an effect on pain on others around you<br>Helping others to help you<br>Good communication or mind reading?                                                                                                    | Introductory video      | Video                         |
|                                    |                                                                                                                                                                                                                                                                 | Education video         | Video                         |
|                                    |                                                                                                                                                                                                                                                                 | Pain Ngata              | Illustration                  |
|                                    |                                                                                                                                                                                                                                                                 | Doors analogy           | Illustration                  |
|                                    |                                                                                                                                                                                                                                                                 | Patient stories         | Video                         |
| <b>12) Pulling it all together</b> | Led by: Pain team (Physios, Occupational therapist and Psychologists)<br>The final module but not the end of the journey<br><br>Pulling it all together and filling your kete<br>Staying connected                                                              | Introductory video      | Video                         |
|                                    |                                                                                                                                                                                                                                                                 | Education video         | Video                         |
|                                    |                                                                                                                                                                                                                                                                 | Explain pain            | <a href="#">YouTube video</a> |
|                                    |                                                                                                                                                                                                                                                                 | NZ Pain Society booklet | <a href="#">PDF</a>           |
|                                    |                                                                                                                                                                                                                                                                 | Walk 3 miles at home    | Text                          |
|                                    |                                                                                                                                                                                                                                                                 | Aqua jogging            | Text                          |
|                                    |                                                                                                                                                                                                                                                                 | Patient stories         | Video                         |
