# Supplementary material
Source: HighWire-hosted journal article supplement (https://bmjopen.bmj.com/content/11/2/e046376)

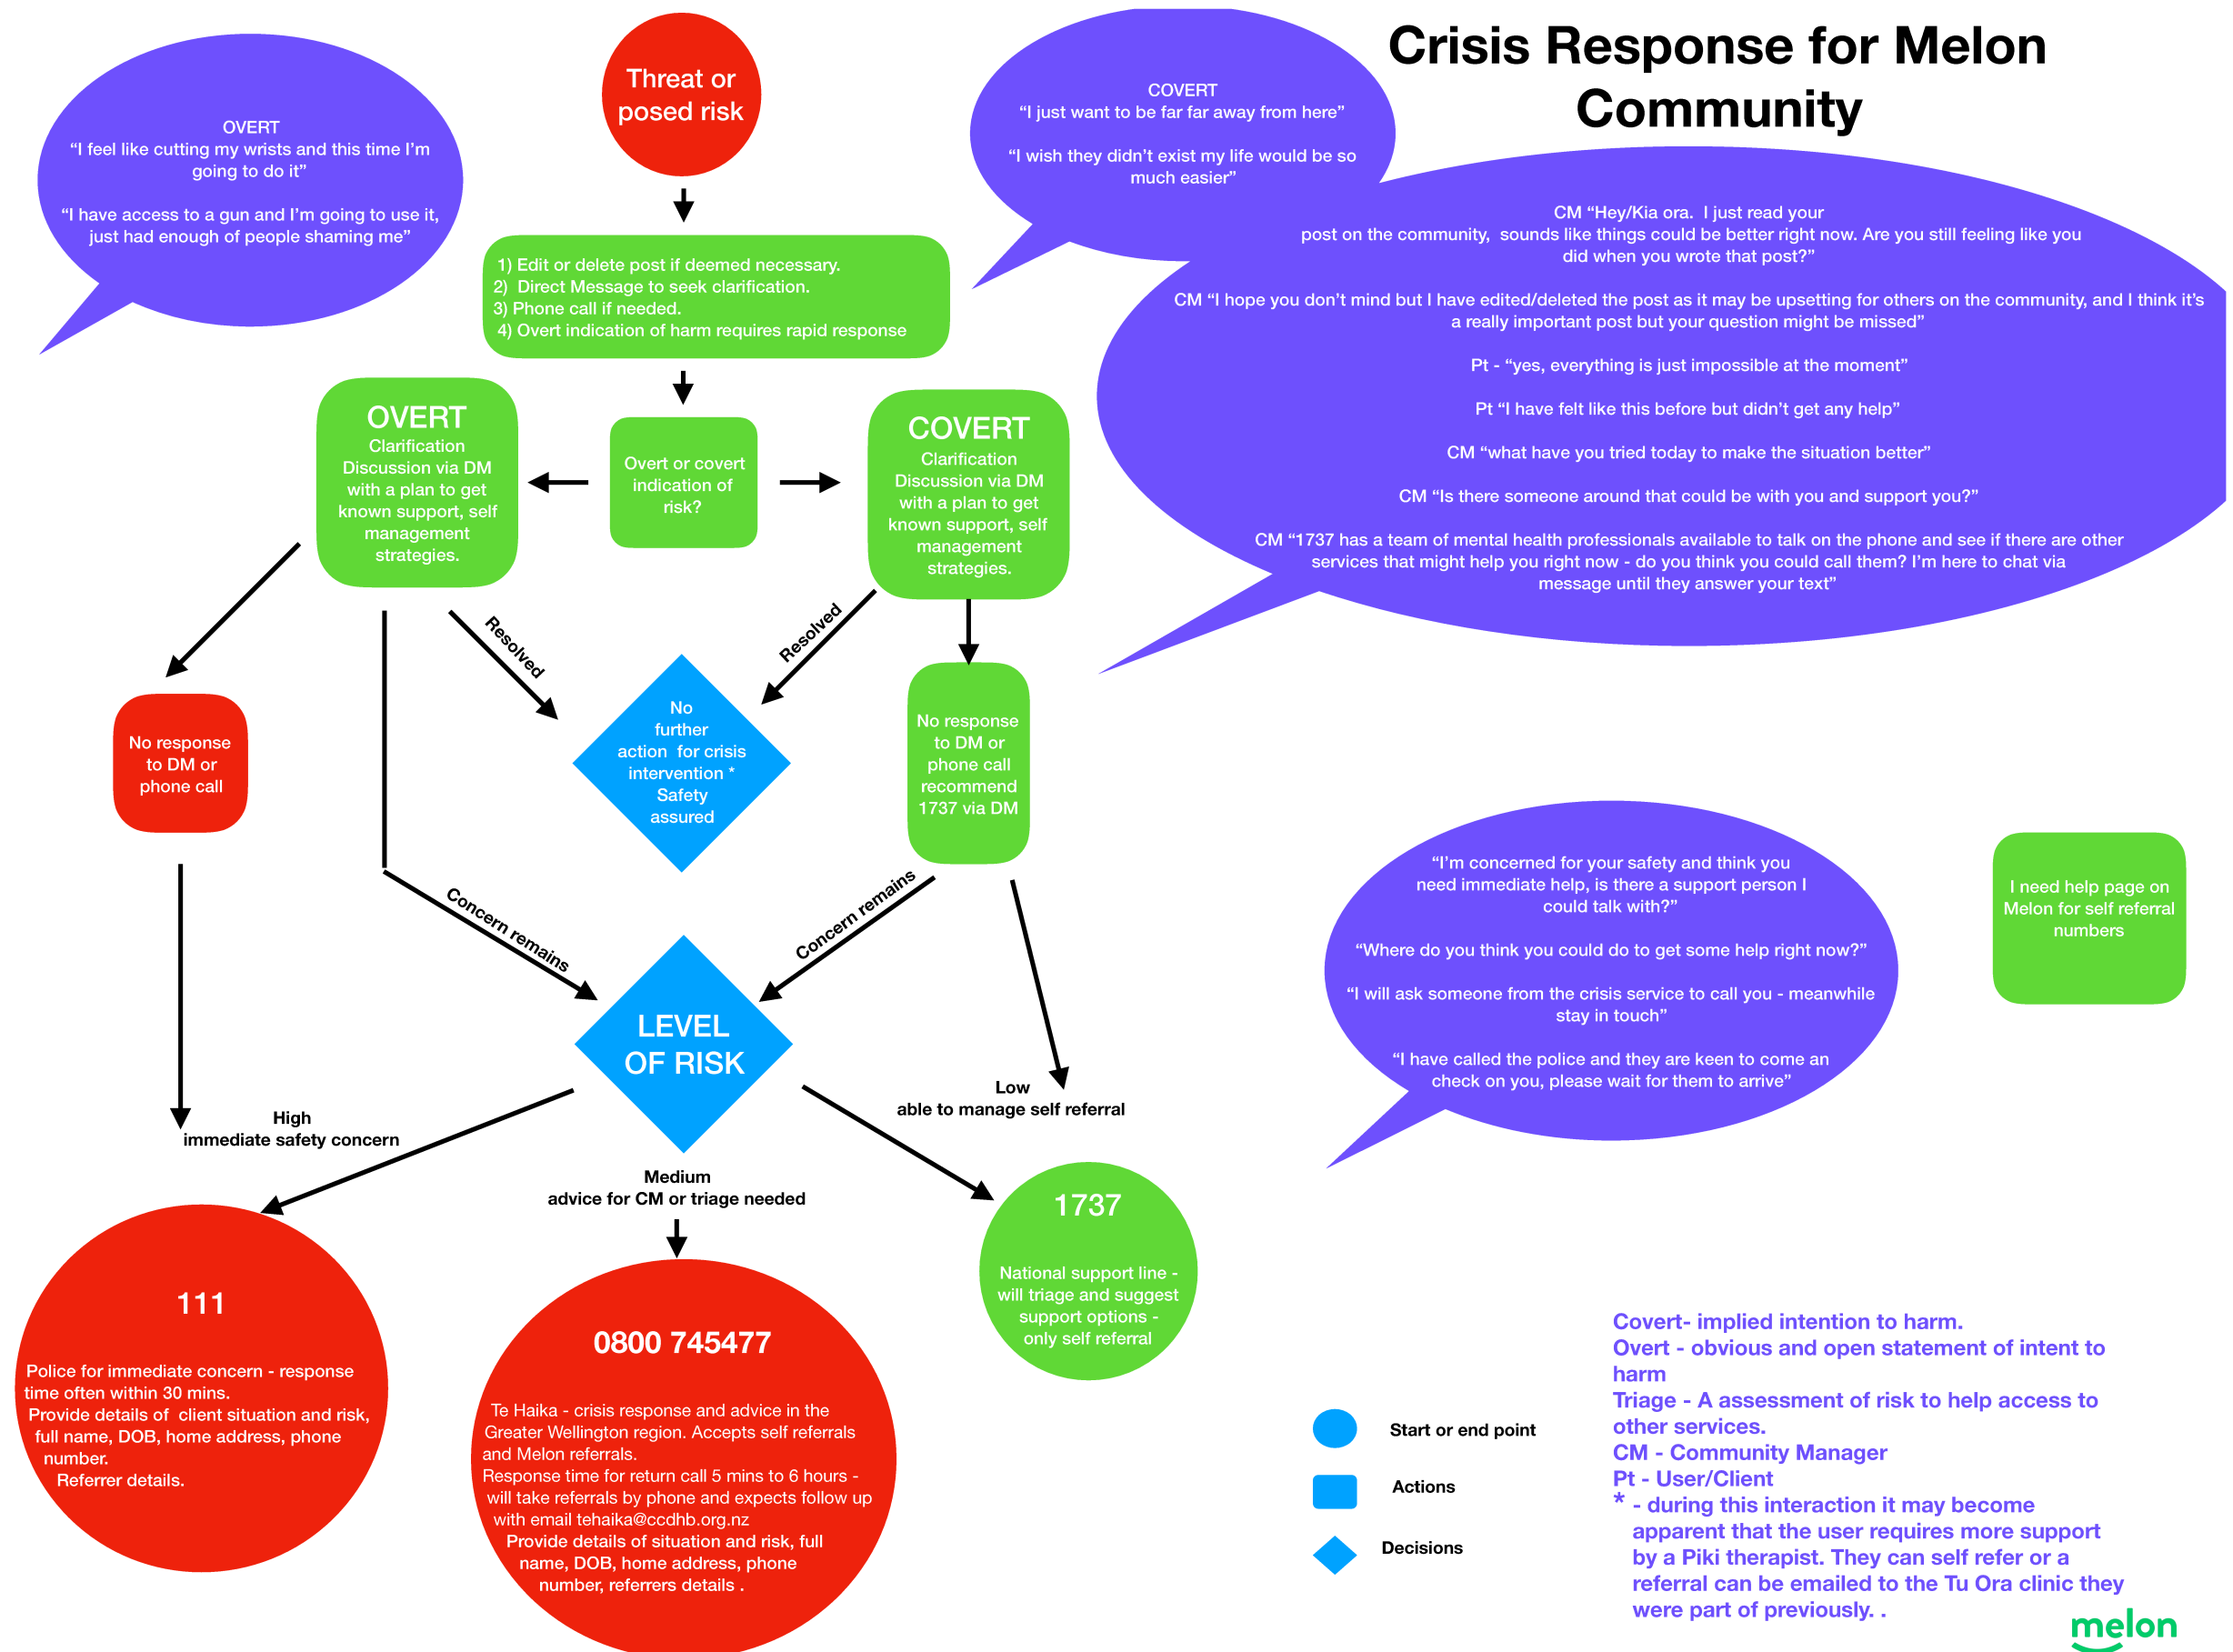

## Safety concerns response flow chart

**1737 - for talk or text support - response times 5 mins - 4hours - no referrals**

**0800 745477 - Te Haika crisis response and advise in the Great Wellington region 5 mins to 6 hours - will take referrals by phone and follow up with email. Provide - name, DOB, home address, phone number, NHI**

**111 - police for immediate (30 mins) response, will take referrals for welfare check DOB, home address, phone number.**

**For the Living with Persistent Pain project please advise Lily - community manager of issue raised after advising the patient you will be doing this.**

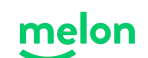

Supplement: inline-supplementary-material-3 [file inline-supplementary-material-3.pdf]
